# Supplementary material for: Synthesis and NMR characterization of the cis and trans isomers of [Ptii(N9-adeH)2(pz)2] and X-ray crystallography of the trans isomer
Source: Royal Society of Chemistry journal article supplement (doi:10.1039/b709697f), 2007-01-01
Supplement: b709697f.pdf [file b709697f.pdf]

Supplementary Material (ESI) for Dalton Transactions

This journal is (c) The Royal Society of Chemistry 2007

**Synthesis and NMR characterization of the *cis* and *trans* isomers of  
[Pt<sup>II</sup>(*N*<sup>9</sup>-adeH)<sub>2</sub>(pz)<sub>2</sub>] and X-ray crystallography of the *trans* isomer**

Karel D. Klika,<sup>\*a,b</sup> Henri Kivelä,<sup>a</sup> Vladimir V. Ovcharenko,<sup>a</sup>  
Ville Nieminen,<sup>c</sup> Reijo Sillanpää<sup>d</sup> and Jorma Arpalahti<sup>a</sup>

<sup>a</sup> Department of Chemistry, University of Turku, Vatselankatu 2, FIN-20014 Turku, Finland. E-mail: [klikakd@yahoo.co.uk](mailto:klikakd@yahoo.co.uk), <sup>b</sup> The UNSW Analytical Centre, Chemical Sciences Building (F10), University of New South Wales, Sydney, Australia NSW 2052, <sup>c</sup> Laboratory of Industrial Chemistry, Process Chemistry Centre, Åbo Akademi University, Piispankatu 8, FIN-20500 Turku, Finland, <sup>d</sup> Department of Chemistry, University of Jyväskylä, Surfontie 9, FIN-40014 Jyväskylä, Finland

Electronic Supplementary Information:

Tables of NMR and MS data for **1–3** and the free ligands;

the X-ray structure of *trans*-[Pt<sup>II</sup>(*N*<sup>9</sup>-adeH)<sub>2</sub>(pz)<sub>2</sub>](NO<sub>3</sub>)<sub>4</sub>·H<sub>2</sub>O (**2**);

X-ray structure tables including cif file and atomic coordinates;

Cartesian coordinates of the optimized structures of **2** and **3** (also available as separate files).

**Table 1**  $^{195}\text{Pt}$ ,  $^{13}\text{C}$ , and  $^{15}\text{N}$  chemical shifts<sup>a</sup> ( $\delta$ , ppm) for compounds **1–3** and the free ligands

|                       | Pt <sup>b</sup>    | C-2                 | C-4    | C-5    | C-6    | C-8                | C $\alpha$ | C $\beta$ | N-1           | N-3    | N-6    | N-7    | N-9    | N-Pt   | N $\gamma$ |
|-----------------------|--------------------|---------------------|--------|--------|--------|--------------------|------------|-----------|---------------|--------|--------|--------|--------|--------|------------|
| pyrazine              | –                  | –                   | –      | –      | –      | –                  | 147.63     | –         | –             | –      | –      | –      | –      | –62.06 | –          |
| adenine <sup>c</sup>  | –                  | 154.68 <sup>d</sup> | no     | 118.8  | 156.9  | 143.1 <sup>d</sup> | –          | –         | Not measured. |        |        | –      | –      | –      | –          |
| adenine <sup>e</sup>  | –                  | 152.29              | 150.2  | 118.3  | 155.6  | 138.9              | –          | –         | –145.0        | –155.1 | –301.1 | –139.7 | –223.1 | –      | –          |
| <b>1</b>              | –2450              | –                   | –      | –      | –      | –                  | 149.35     | 152.17    | –             | –      | –      | –      | –      | –168.7 | –42.8      |
| <b>2</b> <sup>f</sup> | –2387, –2423 (5:1) | 148.76              | 157.65 | 118.65 | 152.69 | 151.57             | 150.32     | 151.02    | –210.6        | –155.4 | no     | –171.7 | –234.4 | –166.5 | –46.6      |
| <b>3</b> <sup>f</sup> | –2412, –2381 (3:1) | 150.22              | 157.59 | 117.50 | 152.55 | 151.49             | 149.04     | 151.57    | –210.1        | –153.9 | no     | –181.7 | –242.5 | –160.4 | –47.4      |
| <b>2</b> <sup>g</sup> | Not measured.      | 151.42              | 158.0  | 120.7  | 155.7  | 151.63             | 150.12     | 150.68    | Not measured. |        |        | –      | –      | –      |            |
| <b>3</b> <sup>g</sup> | –2400, –2370 (8:1) | 153.92              | 158.56 | 121.95 | 157.84 | 151.85             | 150.13     | 151.01    | –158.9 ↔      | –156.2 | no     | –151.7 | –249.6 | –152.6 | –49.1      |

Legend: no, not observed. <sup>a</sup> Spectra acquired in D<sub>2</sub>O or H<sub>2</sub>O/D<sub>2</sub>O mixtures at 25 °C and referenced internally to TSP for carbon (0 ppm) and externally to nitromethane for nitrogen (0 ppm) and [PtCl<sub>4</sub>]<sup>2-</sup> for platinum (–1625 ppm); for  $^{13}\text{C}$  and  $^{15}\text{N}$ , shifts given to one decimal place indicate that they were acquired indirectly or are very broad signals in directly-measured spectra. <sup>b</sup> Two platinum signals were observed for **2** and **3** with the respective ratio given in parentheses. <sup>c</sup> Acquired in D<sub>2</sub>O/DMSO-*d*<sub>6</sub> (ca. 2:1). <sup>d</sup> In D<sub>2</sub>O: 155.4 (C-2); 143.9 (C-8). <sup>e</sup> Acquired in DMSO-*d*<sub>6</sub>. <sup>f</sup> Spectra of the tetraprotonated species. <sup>g</sup> Spectra of the neutral complexes.

**Table 2**  $^1\text{H}$  NMR data<sup>a</sup> ( $\delta$ , ppm;  $J$ , Hz) for compounds **1–3** and the free ligands and MS (% RA) for compounds **1–3**

|                      | H-2,<br>H-8           | H $\alpha$ ,<br>H $\beta$ | NH <sub>2</sub> s | $J_{\alpha,\beta}$ <sup>b</sup> | $J_{\alpha,\alpha'}$ ,<br>$J_{\beta,\beta'}$ <sup>b</sup> | Prominent ions <sup>c</sup> from ESI <sup>+</sup> /FAB <sup>+</sup> -MS with RAs and tentative assignments;<br><sup>1</sup> H NMR in other solvents; other comments                                                                                                                                                                                                                                                                                                                                                                                                                                                                                    |
|----------------------|-----------------------|---------------------------|-------------------|---------------------------------|-----------------------------------------------------------|--------------------------------------------------------------------------------------------------------------------------------------------------------------------------------------------------------------------------------------------------------------------------------------------------------------------------------------------------------------------------------------------------------------------------------------------------------------------------------------------------------------------------------------------------------------------------------------------------------------------------------------------------------|
| pyrazine             | –                     | 8.654, s                  | –                 | –                               | –                                                         | –                                                                                                                                                                                                                                                                                                                                                                                                                                                                                                                                                                                                                                                      |
| adenine              | 8.222, s;<br>8.174, s | –                         | no                | –                               | –                                                         | In D <sub>2</sub> O/DMSO- <i>d</i> <sub>6</sub> ( <i>ca.</i> 2:1): 8.229 (s, H-2), 8.208 (s, H-8); H-6s and H-9 not observed.<br>In DMSO- <i>d</i> <sub>6</sub> : 12.828, (v b s, H-9); 7.088 (2H, b s, H-6s); 8.114 (s, H-2), 8.098 (s, H-8).                                                                                                                                                                                                                                                                                                                                                                                                         |
| <b>1</b>             | –                     | 9.053, m;<br>8.839, m     | –                 | 3.40,<br>1.23                   | 0.00,<br>–0.68                                            | ESI <sup>+</sup> : 583 <sup>d</sup> (3.65, [Pt(pz) <sub>3</sub> TSP]); 576 (0.43, [Pt(pz) <sub>4</sub> ]·NO <sub>3</sub> ); 503 (12.9, [Pt(pz) <sub>2</sub> TSP]); 496 (3.83, [Pt(pz) <sub>3</sub> ]·NO <sub>3</sub> ); 423 (9.33, [Pt(pz)TSP]); 416 (46.0, [Pt(pz) <sub>2</sub> ]·NO <sub>3</sub> ).                                                                                                                                                                                                                                                                                                                                                  |
| <b>2<sup>e</sup></b> | 8.368, s;<br>8.509, s | 8.772, m;<br>8.602, m     | no                | 3.45,<br>1.22                   | –0.01,<br>–0.65                                           | FAB <sup>+</sup> : 623.1402 ([ <sup>194</sup> Pt(ade) <sub>2</sub> (pz) <sub>2</sub> ] + H); 624.1428 ([ <sup>195</sup> Pt(ade) <sub>2</sub> (pz) <sub>2</sub> ] + H).<br>calc: 623.1387 (78.0, [ <sup>194</sup> Pt(ade) <sub>2</sub> (pz) <sub>2</sub> ] + H); 624.1408 (100, [ <sup>195</sup> Pt(ade) <sub>2</sub> (pz) <sub>2</sub> ] + H).<br>ESI <sup>+</sup> : 685! (1.35, [Pt <sup>III</sup> (ade) <sub>2</sub> (pz) <sub>2</sub> ]·NO <sub>3</sub> ); 623 <sup>e</sup> (8.87, [Pt(ade) <sub>2</sub> (pz) <sub>2</sub> ] + H); 543 (12.0, [Pt(ade) <sub>2</sub> (pz)] + H); 463 (10.7, [Pt(ade) <sub>2</sub> ] + H); 408 (26.9, [Pt(ade)(pz)]). |
| <b>3<sup>e</sup></b> | 8.459, s;<br>8.582, s | 9.145, m;<br>8.841, m     | no                | 3.41,<br>1.24                   | –0.11,<br>–0.63                                           | FAB <sup>+</sup> : 623.1390 (83.1, [ <sup>194</sup> Pt(ade) <sub>2</sub> (pz) <sub>2</sub> ] + H); 624.1412 (100, [ <sup>195</sup> Pt(ade) <sub>2</sub> (pz) <sub>2</sub> ] + H); 625 (91.0); 626 (25.4); 627 (21.4); 628 (5.96); 543 (6.44, [Pt(ade) <sub>2</sub> (pz)] + H).<br>calc: 623.1387 (78.0, [ <sup>194</sup> Pt(ade) <sub>2</sub> (pz) <sub>2</sub> ] + H); 624.1408 (100, [ <sup>195</sup> Pt(ade) <sub>2</sub> (pz) <sub>2</sub> ] + H); 625 (82.8); 626 (18.0); 627 (19.2); 628 (4.51).                                                                                                                                                 |
| <b>2<sup>f</sup></b> | 8.267, s;<br>8.279, s | 8.694, m;<br>8.562, m     | 7.17 b s          | 3.46,<br>1.23                   | –0.11,<br>–0.62                                           | MS not measured. For a sample of tetraprotonated <b>2</b> examined under quality conditions ( $\nu_{\frac{1}{2},\text{TSP}} = 0.21$ Hz), $^6J_{\text{H2,H8}}$ was observable ( $J = 0.18$ Hz) by the multiplicity of H-2. Though H-8 remained as a “singlet” due to its linewidth ( $\nu_{\frac{1}{2},\text{H8}}, 0.44$ ; $\nu_{\frac{1}{2},\text{H2}}, 0.26$ Hz), its shape was correctly simulated by Perch. <sup>1</sup> For adenine ( <i>N</i> <sup>9</sup> tautomer), a value of 0.15 Hz was calculated <sup>2</sup> for $^6J_{\text{H2,H8}}$ .                                                                                                   |
| <b>3<sup>f</sup></b> | 8.282, s;<br>8.082, s | 9.079, m;<br>8.811, m     | 6.50 b s          | 3.41,<br>1.21                   | –0.02,<br>–0.61                                           | ESI <sup>+</sup> : 1267 (3.65, {[Pt(ade) <sub>2</sub> (pz) <sub>2</sub> ]} <sub>2</sub> + Na); 1187 (2.42, [Pt(ade) <sub>2</sub> (pz) <sub>2</sub> ] + [Pt(ade) <sub>2</sub> (pz)] + Na); 1110 (3.08, [Pt(ade) <sub>2</sub> (pz) <sub>2</sub> ] + [Pt(ade)(pz) <sub>2</sub> ]); 645 (95.2, [Pt(ade) <sub>2</sub> (pz) <sub>2</sub> ] + Na); 565 (48.1, [Pt(ade) <sub>2</sub> (pz)] + Na); 485 (40.0, [Pt(ade) <sub>2</sub> ] + Na); 408 (18.1, [Pt(ade)(pz)]).                                                                                                                                                                                         |

Legend: b, broad; m, multiplet; no, not observed; s, singlet. <sup>a</sup> NMR spectra acquired in D<sub>2</sub>O or H<sub>2</sub>O/D<sub>2</sub>O mixtures at 25 °C and referenced to TSP (0 ppm). <sup>b</sup> Couplings extracted using Perch simulation.<sup>1</sup> The signs of the couplings were assumed based on the number of intervening bonds, *i.e.* if *n* is even, <sup>n</sup>*J* was entered as a negative value prior to initiation of the iteration; if *n* is odd, <sup>n</sup>*J* was entered as a positive value. <sup>c</sup> All ions provided patterns consistent with the natural isotopic distribution of platinum and only ions of the <sup>194</sup>Pt and/or <sup>195</sup>Pt isotopomers (except in one case) are reported as nominal values relative to the highest mass ligand when it is the base peak; corresponding Na<sup>+</sup> (H<sup>+</sup>) adducts also present at weaker intensities for each H<sup>+</sup> (Na<sup>+</sup>) adduct; TSP = *d*<sub>4</sub>-trimethylsilyl propanoate. <sup>d</sup> Results confirmed by FAB<sup>+</sup> analysis and HRMS on the <sup>194</sup>Pt and <sup>195</sup>Pt isotopomers. <sup>e</sup> Spectra of the tetraprotonated species. <sup>f</sup> Spectra of the neutral complexes.

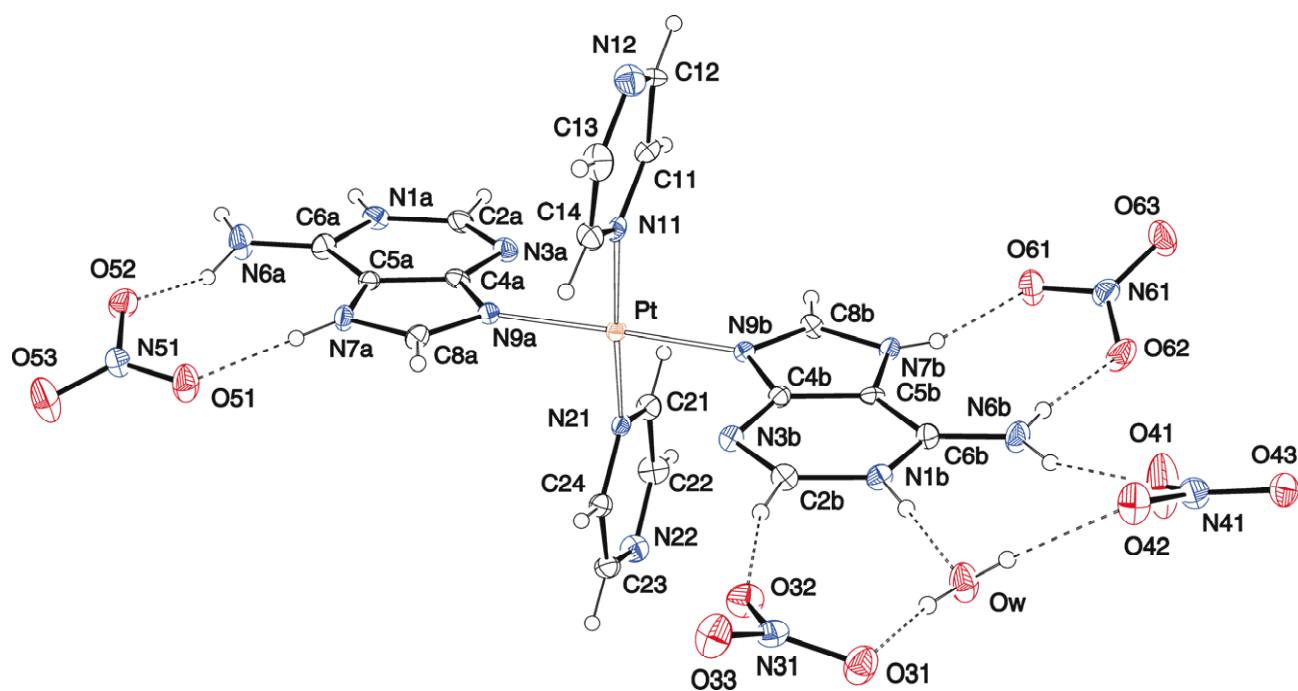

**Fig. ESI1** The X-ray structure of *trans*-[Pt<sup>II</sup>(*N*<sup>9</sup>-adeH)<sub>2</sub>(pz)<sub>2</sub>](NO<sub>3</sub>)<sub>4</sub>·H<sub>2</sub>O (**2**).

Supplementary Material (ESI) for Dalton Transactions  
This journal is (c) The Royal Society of Chemistry 2007  
Table 1. Crystal data and structure refinement for 2.

Identification code arpa1u

Empirical formula C<sub>18</sub> H<sub>22</sub> N<sub>18</sub> O<sub>13</sub> Pt

Formula weight 893.63

Temperature 173(2) K

Wavelength 0.71073 Å

Crystal system, space group Monoclinic, P 2<sub>1</sub>/c

Unit cell dimensions a = 10.8863(2) Å alpha = 90 deg.

b = 11.0417(3) Å beta = 95.512(2) deg.

c = 24.5202(7) Å gamma = 90 deg.

Volume 2933.78(13) Å<sup>3</sup>

Z, 4

Calculated density 2.023 Mg/m<sup>3</sup>

Absorption coefficient 4.881 mm<sup>-1</sup>

F(000) 1752

Crystal size 0.16 x 0.14 x 0.12 mm

Theta range for data collection 2.39 to 26.37 deg.

Limiting indices -13 ≤ h ≤ 11, -12 ≤ k ≤ 13, -24 ≤ l ≤ 30

Reflections collected / unique 18581 / 5988 [R(int) = 0.0513]

Completeness to theta = 26.37 99.6 %

Absorption correction Empirical (SHELXA)

Max. and min. transmission 0.557 and 0.448

Refinement method Full-matrix least-squares on F<sup>2</sup>

Data / restraints / parameters 5988 / 0 / 493

Goodness-of-fit on F<sup>2</sup> 1.070

Final R indices [I > 2σ(I)] R<sub>1</sub> = 0.0348, wR<sub>2</sub> = 0.0643

R indices (all data) R<sub>1</sub> = 0.0457, wR<sub>2</sub> = 0.0686

Largest diff. peak and hole 0.637 and -0.660 e.Å<sup>-3</sup>

Supplementary Material (ESI) for Dalton Transactions

This journal is (c) The Royal Society of Chemistry 2007

Table 2. Atomic coordinates ( $\times 10^4$ ) and equivalent isotropic displacement parameters ( $\text{\AA}^2 \times 10^3$ ) for **2**.

U(eq) is defined as one third of the trace of the orthogonalized Uij tensor.

---

x y z U(eq)

---

Pt -98(1) 8595(1) 1186(1) 18(1)  
OW 4422(4) 7349(5) -1196(2) 41(1)  
N(1A) -3566(4) 9925(4) 2600(2) 26(1)  
C(2A) -2345(5) 9632(5) 2670(2) 28(1)  
N(3A) -1670(4) 9340(4) 2279(2) 27(1)  
C(4A) -2313(4) 9384(5) 1780(2) 21(1)  
C(5A) -3528(4) 9717(5) 1665(2) 20(1)  
C(6A) -4237(5) 10001(5) 2099(2) 26(1)  
N(6A) -5403(4) 10298(6) 2052(2) 40(1)  
N(7A) -3794(4) 9664(4) 1108(2) 25(1)  
C(8A) -2774(4) 9303(5) 897(2) 23(1)  
N(9A) -1844(3) 9109(4) 1293(2) 19(1)  
N(1B) 3373(4) 7527(4) -271(2) 23(1)  
C(2B) 2175(5) 7896(5) -333(2) 23(1)  
N(3B) 1495(3) 8130(4) 66(2) 21(1)  
C(4B) 2114(4) 7958(4) 569(2) 19(1)  
C(5B) 3338(4) 7613(4) 665(2) 19(1)  
N(6B) 5164(4) 6969(5) 253(2) 31(1)  
C(6B) 4024(4) 7356(5) 225(2) 24(1)  
N(7B) 3596(4) 7568(4) 1228(2) 21(1)  
C(8B) 2566(4) 7873(5) 1444(2) 21(1)  
N(9B) 1646(3) 8112(4) 1066(2) 20(1)  
N(11) -603(3) 6864(4) 1036(2) 21(1)  
N(12) -1141(4) 4432(4) 856(2) 36(1)  
C(11) -442(4) 6055(5) 1445(2) 24(1)  
C(12) -722(5) 4849(5) 1347(2) 27(1)  
C(13) -1302(5) 5253(6) 457(3) 37(2)  
C(14) -1053(4) 6467(5) 542(2) 28(1)  
N(21) 478(3) 10288(4) 1362(2) 21(1)  
N(22) 1364(4) 12596(4) 1603(2) 33(1)  
C(21) 942(5) 10579(5) 1876(2) 26(1)  
C(22) 1369(5) 11730(5) 1985(2) 35(1)  
C(23) 902(5) 12284(5) 1104(2) 28(1)  
C(24) 461(4) 11127(5) 974(2) 23(1)  
N(31) 1925(4) 7563(4) -2131(2) 30(1)  
O(31) 3037(3) 7463(4) -2219(2) 40(1)  
O(32) 1668(4) 7915(4) -1670(2) 37(1)  
O(33) 1094(4) 7309(4) -2497(2) 44(1)  
N(41) 6840(4) 5390(5) -933(2) 33(1)  
O(41) 6714(4) 5982(6) -517(2) 74(2)  
O(42) 5942(3) 5321(4) -1298(2) 40(1)  
O(43) 7818(3) 4858(4) -995(2) 36(1)  
N(51) -6680(4) 10764(5) 584(2) 31(1)  
O(51) -5704(3) 10456(4) 385(2) 41(1)  
O(52) -6824(3) 10515(4) 1069(2) 37(1)  
O(53) -7501(4) 11277(5) 286(2) 58(2)  
N(61) 6375(4) 6247(5) 1722(2) 33(1)  
O(61) 5488(3) 6782(4) 1923(2) 40(1)  
O(62) 6631(3) 6539(5) 1251(2) 48(1)  
O(63) 6972(4) 5489(5) 1998(2) 49(1)

---

Pt-N(21) 2.006(4)  
Pt-N(11) 2.013(4)  
Pt-N(9B) 2.020(4)  
Pt-N(9A) 2.025(4)  
OW-H(1OW) 0.84(7)  
OW-H(2OW) 0.73(7)  
N(1A)-C(2A) 1.363(7)  
N(1A)-C(6A) 1.369(7)  
N(1A)-H(1A) 0.84(6)  
C(2A)-N(3A) 1.304(7)  
C(2A)-H(2A) 0.94(6)  
N(3A)-C(4A) 1.352(6)  
C(4A)-C(5A) 1.376(7)  
C(4A)-N(9A) 1.376(6)  
C(5A)-N(7A) 1.370(6)  
C(5A)-C(6A) 1.409(7)  
C(6A)-N(6A) 1.306(7)  
N(6A)-H(6A1) 0.98(7)  
N(6A)-H(6A2) 0.83(6)  
N(7A)-C(8A) 1.330(6)  
N(7A)-H(7A) 0.87(6)  
C(8A)-N(9A) 1.349(6)  
C(8A)-H(8A) 0.94(5)  
N(1B)-C(6B) 1.361(7)  
N(1B)-C(2B) 1.361(6)  
N(1B)-H(1B) 0.81(6)  
C(2B)-N(3B) 1.308(6)  
C(2B)-H(2B) 0.98(5)  
N(3B)-C(4B) 1.362(6)  
C(4B)-N(9B) 1.375(6)  
C(4B)-C(5B) 1.385(6)  
C(5B)-N(7B) 1.382(6)  
C(5B)-C(6B) 1.400(7)  
N(6B)-C(6B) 1.308(7)  
N(6B)-H(6B1) 0.75(6)  
N(6B)-H(6B2) 0.82(6)  
N(7B)-C(8B) 1.330(6)  
N(7B)-H(7B) 0.76(5)  
C(8B)-N(9B) 1.325(6)  
C(8B)-H(8B) 0.87(5)  
N(11)-C(14) 1.337(7)  
N(11)-C(11) 1.342(7)  
N(12)-C(12) 1.328(7)  
N(12)-C(13) 1.331(8)  
C(11)-C(12) 1.383(7)  
C(11)-H(11) 0.9500  
C(12)-H(12) 0.9500  
C(13)-C(14) 1.379(8)  
C(13)-H(13) 0.9500  
C(14)-H(14) 0.9500  
N(21)-C(24) 1.327(6)  
N(21)-C(21) 1.351(6)  
N(22)-C(23) 1.325(7)  
N(22)-C(22) 1.337(7)  
C(21)-C(22) 1.370(8)  
C(21)-H(21) 0.9500  
C(22)-H(22) 0.9500  
C(23)-C(24) 1.390(7)  
C(23)-H(23) 0.9500  
C(24)-H(24) 0.9500  
N(31)-O(33) 1.243(6)  
N(31)-O(32) 1.252(6)

Supplementary Material (ESI) for Dalton Transactions  
This journal is (c) The Royal Society of Chemistry 2007

N(31)-O(31) 1.255(6)  
N(41)-O(41) 1.231(6)  
N(41)-O(43) 1.238(6)  
N(41)-O(42) 1.263(6)  
N(51)-O(53) 1.236(6)  
N(51)-O(52) 1.247(6)  
N(51)-O(51) 1.257(5)  
N(61)-O(63) 1.223(6)  
N(61)-O(62) 1.256(6)  
N(61)-O(61) 1.271(6)

N(21)-Pt-N(11) 177.02(16)  
N(21)-Pt-N(9B) 89.91(16)  
N(11)-Pt-N(9B) 88.10(16)  
N(21)-Pt-N(9A) 89.38(16)  
N(11)-Pt-N(9A) 92.65(16)  
N(9B)-Pt-N(9A) 178.65(17)  
H(1OW)-OW-H(2OW) 113(7)  
C(2A)-N(1A)-C(6A) 123.8(4)  
C(2A)-N(1A)-H(1A) 118(4)  
C(6A)-N(1A)-H(1A) 118(4)  
N(3A)-C(2A)-N(1A) 125.3(5)  
N(3A)-C(2A)-H(2A) 121(3)  
N(1A)-C(2A)-H(2A) 113(3)  
C(2A)-N(3A)-C(4A) 112.2(4)  
N(3A)-C(4A)-C(5A) 126.8(5)  
N(3A)-C(4A)-N(9A) 125.1(4)  
C(5A)-C(4A)-N(9A) 108.1(4)  
N(7A)-C(5A)-C(4A) 107.5(4)  
N(7A)-C(5A)-C(6A) 133.2(5)  
C(4A)-C(5A)-C(6A) 119.3(5)  
N(6A)-C(6A)-N(1A) 121.6(5)  
N(6A)-C(6A)-C(5A) 126.0(5)  
N(1A)-C(6A)-C(5A) 112.4(4)  
C(6A)-N(6A)-H(6A1) 118(4)  
C(6A)-N(6A)-H(6A2) 120(5)  
H(6A1)-N(6A)-H(6A2) 122(6)  
C(8A)-N(7A)-C(5A) 107.1(4)  
C(8A)-N(7A)-H(7A) 116(4)  
C(5A)-N(7A)-H(7A) 136(4)  
N(7A)-C(8A)-N(9A) 111.5(5)  
N(7A)-C(8A)-H(8A) 125(3)  
N(9A)-C(8A)-H(8A) 124(3)  
C(8A)-N(9A)-C(4A) 105.9(4)  
C(8A)-N(9A)-Pt 126.9(3)  
C(4A)-N(9A)-Pt 127.2(3)  
C(6B)-N(1B)-C(2B) 123.5(4)  
C(6B)-N(1B)-H(1B) 118(4)  
C(2B)-N(1B)-H(1B) 118(4)  
N(3B)-C(2B)-N(1B) 125.5(5)  
N(3B)-C(2B)-H(2B) 123(3)  
N(1B)-C(2B)-H(2B) 112(3)  
C(2B)-N(3B)-C(4B) 112.6(4)  
N(3B)-C(4B)-N(9B) 126.3(4)  
N(3B)-C(4B)-C(5B) 125.2(4)  
N(9B)-C(4B)-C(5B) 108.5(4)  
N(7B)-C(5B)-C(4B) 106.2(4)  
N(7B)-C(5B)-C(6B) 133.7(5)  
C(4B)-C(5B)-C(6B) 120.0(5)  
C(6B)-N(6B)-H(6B1) 120(5)  
C(6B)-N(6B)-H(6B2) 124(4)  
H(6B1)-N(6B)-H(6B2) 116(6)  
N(6B)-C(6B)-N(1B) 120.2(5)  
N(6B)-C(6B)-C(5B) 126.7(5)  
N(1B)-C(6B)-C(5B) 113.0(4)



Supplementary Material (ESI) for Dalton Transactions  
This journal is (c) The Royal Society of Chemistry 2007

C(8B)-N(7B)-C(5B) 106.9(4)  
C(8B)-N(7B)-H(7B) 131(4)  
C(5B)-N(7B)-H(7B) 122(4)  
N(9B)-C(8B)-N(7B) 112.4(5)  
N(9B)-C(8B)-H(8B) 128(3)  
N(7B)-C(8B)-H(8B) 120(3)  
C(8B)-N(9B)-C(4B) 106.0(4)  
C(8B)-N(9B)-Pt 127.4(3)  
C(4B)-N(9B)-Pt 126.5(3)  
C(14)-N(11)-C(11) 118.0(5)  
C(14)-N(11)-Pt 123.1(4)  
C(11)-N(11)-Pt 118.8(3)  
C(12)-N(12)-C(13) 116.0(5)  
N(11)-C(11)-C(12) 120.0(5)  
N(11)-C(11)-H(11) 120.0  
C(12)-C(11)-H(11) 120.0  
N(12)-C(12)-C(11) 122.9(5)  
N(12)-C(12)-H(12) 118.6  
C(11)-C(12)-H(12) 118.6  
N(12)-C(13)-C(14) 122.8(6)  
N(12)-C(13)-H(13) 118.6  
C(14)-C(13)-H(13) 118.6  
N(11)-C(14)-C(13) 120.3(5)  
N(11)-C(14)-H(14) 119.8  
C(13)-C(14)-H(14) 119.8  
C(24)-N(21)-C(21) 118.8(5)  
C(24)-N(21)-Pt 120.9(4)  
C(21)-N(21)-Pt 120.3(4)  
C(23)-N(22)-C(22) 115.9(5)  
N(21)-C(21)-C(22) 119.4(5)  
N(21)-C(21)-H(21) 120.3  
C(22)-C(21)-H(21) 120.3  
N(22)-C(22)-C(21) 123.3(5)  
N(22)-C(22)-H(22) 118.4  
C(21)-C(22)-H(22) 118.4  
N(22)-C(23)-C(24) 122.9(5)  
N(22)-C(23)-H(23) 118.6  
C(24)-C(23)-H(23) 118.6  
N(21)-C(24)-C(23) 119.8(5)  
N(21)-C(24)-H(24) 120.1  
C(23)-C(24)-H(24) 120.1  
O(33)-N(31)-O(32) 120.8(5)  
O(33)-N(31)-O(31) 120.3(5)  
O(32)-N(31)-O(31) 119.0(5)  
O(41)-N(41)-O(43) 121.2(5)  
O(41)-N(41)-O(42) 118.7(5)  
O(43)-N(41)-O(42) 120.1(5)  
O(53)-N(51)-O(52) 121.0(4)  
O(53)-N(51)-O(51) 119.0(5)  
O(52)-N(51)-O(51) 119.9(4)  
O(63)-N(61)-O(62) 122.0(5)  
O(63)-N(61)-O(61) 119.2(5)  
O(62)-N(61)-O(61) 118.8(5)

---

Symmetry transformations used to generate equivalent atoms:

Supplementary Material (ESI) for Dalton Transactions

This journal is (c) The Royal Society of Chemistry 2007

Table 4. Anisotropic displacement parameters ( $\text{\AA}^2 \times 10^3$ ) for **2**.

The anisotropic displacement factor exponent takes the form:

$$-2 \pi^2 [ h^2 a^{*2} U_{11} + \dots + 2 h k a^* b^* U_{12} ]$$

---

U11 U22 U33 U23 U13 U12

---

Pt 17(1) 18(1) 19(1) 0(1) 5(1) 1(1)  
 OW 34(2) 61(4) 26(2) -2(2) 5(2) 15(2)  
 N(1A) 34(3) 29(3) 19(2) 1(2) 10(2) 5(2)  
 C(2A) 33(3) 31(3) 20(3) 8(2) 6(2) 5(2)  
 N(3A) 27(2) 33(3) 20(2) 5(2) 2(2) 5(2)  
 C(4A) 28(3) 20(3) 16(3) 4(2) 3(2) 3(2)  
 C(5A) 21(2) 17(3) 22(3) 2(2) 4(2) 1(2)  
 C(6A) 27(3) 30(3) 22(3) -2(2) 8(2) 1(2)  
 N(6A) 28(3) 70(4) 23(3) 6(3) 13(2) 17(3)  
 N(7A) 17(2) 33(3) 26(3) 0(2) 4(2) 5(2)  
 C(8A) 23(2) 27(3) 19(3) -4(2) 5(2) 0(2)  
 N(9A) 20(2) 20(2) 17(2) -2(2) 3(2) 1(2)  
 N(1B) 26(2) 27(3) 18(2) -3(2) 7(2) 1(2)  
 C(2B) 28(3) 26(3) 15(3) -4(2) 1(2) 1(2)  
 N(3B) 21(2) 23(2) 18(2) -5(2) 2(2) -2(2)  
 C(4B) 19(2) 15(3) 23(3) -1(2) 5(2) -1(2)  
 C(5B) 24(2) 17(3) 15(2) 2(2) 6(2) -3(2)  
 N(6B) 25(2) 47(3) 24(3) 2(3) 9(2) 6(2)  
 C(6B) 22(2) 23(3) 29(3) 1(2) 5(2) 2(2)  
 N(7B) 16(2) 27(3) 21(2) 1(2) 3(2) 1(2)  
 C(8B) 24(3) 25(3) 16(3) -2(2) 1(2) 4(2)  
 N(9B) 18(2) 19(2) 23(2) 2(2) 6(2) 0(2)  
 N(11) 15(2) 24(2) 26(2) -3(2) 6(2) 0(2)  
 N(12) 39(3) 27(3) 41(3) -5(2) 0(2) 0(2)  
 C(11) 24(3) 26(3) 24(3) -3(2) 6(2) -3(2)  
 C(12) 32(3) 18(3) 32(3) 9(2) 5(2) 0(2)  
 C(13) 35(3) 41(4) 34(3) -10(3) -5(3) 0(3)  
 C(14) 29(3) 28(3) 28(3) 1(3) 0(2) 0(2)  
 N(21) 16(2) 26(3) 21(2) 3(2) 5(2) 2(2)  
 N(22) 37(3) 29(3) 33(3) -6(2) 5(2) -2(2)  
 C(21) 28(3) 29(3) 22(3) -2(2) 0(2) -1(2)  
 C(22) 41(3) 35(4) 27(3) -7(3) 3(2) -2(3)  
 C(23) 31(3) 24(3) 32(3) 5(2) 12(2) 3(2)  
 C(24) 25(3) 22(3) 23(3) -1(2) 9(2) 4(2)  
 N(31) 34(3) 25(3) 30(3) 2(2) 5(2) -5(2)  
 O(31) 33(2) 57(3) 30(2) -1(2) 8(2) 0(2)  
 O(32) 47(2) 41(3) 23(2) -4(2) 12(2) 1(2)  
 O(33) 35(2) 64(3) 32(2) -12(2) -4(2) -4(2)  
 N(41) 35(3) 40(3) 24(3) 4(2) 7(2) 7(2)  
 O(41) 53(3) 132(5) 34(3) -37(3) -5(2) 40(3)  
 O(42) 35(2) 57(3) 27(2) -9(2) 1(2) 7(2)  
 O(43) 33(2) 36(3) 40(2) -1(2) 12(2) 7(2)  
 N(51) 27(2) 35(3) 30(3) 0(2) 1(2) 4(2)  
 O(51) 29(2) 65(3) 31(2) -1(2) 8(2) 13(2)  
 O(52) 31(2) 52(3) 27(2) 9(2) 5(2) -2(2)  
 O(53) 47(3) 102(4) 27(2) 14(3) 11(2) 40(3)  
 N(61) 25(2) 43(3) 31(3) 8(2) 0(2) -4(2)  
 O(61) 32(2) 57(3) 32(2) 3(2) 4(2) 14(2)  
 O(62) 30(2) 84(4) 31(2) 21(2) 7(2) -1(2)  
 O(63) 43(2) 67(3) 39(3) 21(2) 7(2) 24(2)

---

C(6A)-N(1A)-C(2A)-N(3A) -2.9(9)  
N(1A)-C(2A)-N(3A)-C(4A) 1.5(8)  
C(2A)-N(3A)-C(4A)-C(5A) 1.5(8)  
C(2A)-N(3A)-C(4A)-N(9A) -179.3(5)  
N(3A)-C(4A)-C(5A)-N(7A) 178.4(5)  
N(9A)-C(4A)-C(5A)-N(7A) -0.9(6)  
N(3A)-C(4A)-C(5A)-C(6A) -3.0(8)  
N(9A)-C(4A)-C(5A)-C(6A) 177.6(5)  
C(2A)-N(1A)-C(6A)-N(6A) -179.2(6)  
C(2A)-N(1A)-C(6A)-C(5A) 1.2(8)  
N(7A)-C(5A)-C(6A)-N(6A) 0.0(10)  
C(4A)-C(5A)-C(6A)-N(6A) -178.1(6)  
N(7A)-C(5A)-C(6A)-N(1A) 179.6(5)  
C(4A)-C(5A)-C(6A)-N(1A) 1.5(7)  
C(4A)-C(5A)-N(7A)-C(8A) 0.4(6)

Supplementary Material (ESI) for Dalton Transactions  
This journal is (c) The Royal Society of Chemistry 2007  
cif file for 2

\_audit\_creation\_date 2007-05-03T18:29:33-00:00  
\_audit\_creation\_method 'WinGX routine CIF\_UPDATE'  
\_audit\_conform\_dict\_name cif\_core.dic  
\_audit\_conform\_dict\_version 2.3  
\_audit\_conform\_dict\_location ftp://ftp.iucr.org/pub/cif\_core.dic  
\_publ\_requested\_category FM

#-----#  
# CHEMICAL INFORMATION #  
#-----#

\_chemical\_name\_systematic  
;  
?  
;  
\_chemical\_formula\_moiety 'C18 H20 N14 Pt, 4(N O3), H2 O'  
\_chemical\_formula\_sum 'C18 H22 N18 O13 Pt'  
\_chemical\_formula\_weight 893.63  
\_chemical\_compound\_source 'synthesis as described'

#-----#  
# UNIT CELL INFORMATION #  
#-----#

\_symmetry\_cell\_setting monoclinic  
\_symmetry\_space\_group\_name\_H-M 'P 21/c'  
\_symmetry\_space\_group\_name\_Hall '-P 2ybc'  
\_symmetry\_Int\_Tables\_number 14  
loop\_  
\_symmetry\_equiv\_pos\_as\_xyz  
'x, y, z'  
'-x, y+1/2, -z+1/2'  
'-x, -y, -z'  
'x, -y-1/2, z-1/2'

\_cell\_length\_a 10.8863(2)  
\_cell\_length\_b 11.0417(3)  
\_cell\_length\_c 24.5202(7)  
\_cell\_angle\_alpha 90  
\_cell\_angle\_beta 95.512(2)  
\_cell\_angle\_gamma 90  
\_cell\_volume 2933.78(13)  
\_cell\_formula\_units\_Z 4  
\_cell\_measurement\_temperature 173(2)  
\_cell\_measurement\_reflns\_used 5844  
\_cell\_measurement\_theta\_min 0.407  
\_cell\_measurement\_theta\_max 26.373  
\_cell\_measurement\_wavelength 0.71073

#-----#  
# CRYSTAL INFORMATION #  
#-----#

\_exptl\_crystal\_description prism  
\_exptl\_crystal\_colour colourless  
\_exptl\_crystal\_size\_max 0.16  
\_exptl\_crystal\_size\_mid 0.14  
\_exptl\_crystal\_size\_min 0.12  
\_exptl\_crystal\_density\_diffn 2.023  
\_exptl\_crystal\_density\_method 'not measured'  
\_exptl\_crystal\_F\_000 1752  
\_exptl\_special\_details  
;

?

#-----#  
# ABSORPTION CORRECTION #  
#-----#

\_exptl\_absorpt\_coefficient\_mu 4.881  
\_exptl\_absorpt\_correction\_type refdelf  
\_exptl\_absorpt\_process\_details  
;  
Sheldrick, G.M. (anon) SHELX97 Release 97-2 (1998)  
l/sigma threshold for reflections = 5.000  
Delta(U)/lambda\*\*2 = 0.000  
Highest even order spherical harmonic = 6  
Highest odd order spherical harmonic = 3  
;  
\_exptl\_absorpt\_correction\_T\_min 0.448  
\_exptl\_absorpt\_correction\_T\_max 0.557

#-----#  
# DATA COLLECTION #  
#-----#

\_diffrn\_ambient\_temperature 173(2)  
\_diffrn\_radiation\_type MoK $\alpha$   
\_diffrn\_radiation\_monochromator 'horizontally mounted graphite crystal'  
\_diffrn\_radiation\_probe x-ray  
\_diffrn\_radiation\_wavelength 0.71073  
\_diffrn\_source 'Enraf Nonius FR590'  
\_diffrn\_detector 'CCD plate'  
\_diffrn\_detector\_area\_resol\_mean 9  
\_diffrn\_measurement\_device '95mm CCD camera on \k-goniostat'  
\_diffrn\_measurement\_device\_type 'Nonius KappaCCD'  
\_diffrn\_measurement\_method '\f and \w'  
\_diffrn\_reflns\_av\_R\_equivalents 0.0513  
\_diffrn\_reflns\_av\_unetl/netl 0.0502  
\_diffrn\_reflns\_number 18581  
\_diffrn\_reflns\_limit\_h\_min -13  
\_diffrn\_reflns\_limit\_h\_max 11  
\_diffrn\_reflns\_limit\_k\_min -12  
\_diffrn\_reflns\_limit\_k\_max 13  
\_diffrn\_reflns\_limit\_l\_min -24  
\_diffrn\_reflns\_limit\_l\_max 30  
\_diffrn\_reflns\_theta\_min 2.39  
\_diffrn\_reflns\_theta\_max 26.37  
\_diffrn\_reflns\_theta\_full 26.37  
\_diffrn\_measured\_fraction\_theta\_full  
0.996  
\_diffrn\_measured\_fraction\_theta\_max  
0.996  
\_reflns\_number\_total 5988  
\_reflns\_number\_gt 5103  
\_reflns\_threshold\_expression >2sigma(I)

#-----#  
# COMPUTER PROGRAMS USED #  
#-----#

\_computing\_data\_collection 'Collect (Bruker AXS BV, 1997-2004)'  
\_computing\_cell\_refinement  
'HKL Scalepack (Otwinowski & Minor 1997)'  
\_computing\_data\_reduction  
'HKL Denzo and Scalepack (Otwinowski & Minor 1997)'  
\_computing\_structure\_solution 'SHELXS-86 (Sheldrick, 1986)'

Supplementary Material (ESI) for Dalton Transactions

This journal is (c) The Royal Society of Chemistry 2007

\_computing\_structure\_refinement 'SHELXL-97 (Sheldrick, 1997)'

\_computing\_molecular\_graphics 'Ortep-3 for Windows (Farrugia, 1997)'

\_computing\_publication\_material

'WinGX publication routines (Farrugia, 1999)'

#-----#

# REFINEMENT INFORMATION #

#-----#

\_refine\_special\_details

;

Refinement of  $F^2$  against ALL reflections. The weighted R-factor wR and goodness of fit S are based on  $F^2$ , conventional R-factors R are based on F, with F set to zero for negative  $F^2$ . The threshold expression of  $F^2 > 2\sigma(F^2)$  is used only for calculating R-factors(gt) etc. and is not relevant to the choice of reflections for refinement. R-factors based on  $F^2$  are statistically about twice as large as those based on F, and R-factors based on ALL data will be even larger.

;

\_refine\_ls\_structure\_factor\_coef Fsqd

\_refine\_ls\_matrix\_type full

\_refine\_ls\_weighting\_scheme calc

\_refine\_ls\_weighting\_details

'calc w=1/[\sigma^2(Fo^2)+(0.0000P)^2+12.4521P] where P=(Fo^2+2Fc^2)/3'

\_atom\_sites\_solution\_primary direct

\_atom\_sites\_solution\_secondary difmap

\_atom\_sites\_solution\_hydrogens geom

\_refine\_ls\_hydrogen\_treatment mixed

\_refine\_ls\_extinction\_method none

\_refine\_ls\_extinction\_coef ?

\_refine\_ls\_number\_reflns 5988

\_refine\_ls\_number\_parameters 493

\_refine\_ls\_number\_restraints 0

\_refine\_ls\_R\_factor\_all 0.0457

\_refine\_ls\_R\_factor\_gt 0.0348

\_refine\_ls\_wR\_factor\_ref 0.0686

\_refine\_ls\_wR\_factor\_gt 0.0643

\_refine\_ls\_goodness\_of\_fit\_ref 1.070

\_refine\_ls\_restrained\_S\_all 1.070

\_refine\_ls\_shift/su\_max 0.001

\_refine\_ls\_shift/su\_mean 0.000

loop\_

\_atom\_site\_label

\_atom\_site\_type\_symbol

\_atom\_site\_fract\_x

\_atom\_site\_fract\_y

\_atom\_site\_fract\_z

\_atom\_site\_U\_iso\_or\_equiv

\_atom\_site\_adp\_type

\_atom\_site\_occupancy

\_atom\_site\_symmetry\_multiplicity

\_atom\_site\_calc\_flag

\_atom\_site\_refinement\_flags

\_atom\_site\_disorder\_assembly

\_atom\_site\_disorder\_group

Pt Pt -0.009800(16) 0.859508(18) 0.118596(8) 0.01792(6) Uani 1 1 d . . .

OW O 0.4422(4) 0.7349(5) -0.11961(18) 0.0405(12) Uani 1 1 d . . .

H1OW H 0.392(6) 0.742(6) -0.148(3) 0.049 Uiso 1 1 d . . .

H2OW H 0.483(6) 0.683(7) -0.121(3) 0.049 Uiso 1 1 d . . .

N1A N -0.3566(4) 0.9925(4) 0.25998(19) 0.0264(10) Uani 1 1 d . . .

H1A H -0.393(5) 1.007(5) 0.288(2) 0.032 Uiso 1 1 d . . .

C2A C -0.2345(5) 0.9632(5) 0.2670(2) 0.0280(13) Uani 1 1 d . . .

H2A H -0.204(5) 0.957(5) 0.304(2) 0.034 Uiso 1 1 d . . .

## Supplementary Material (ESI) for Dalton Transactions

This journal is (c) The Royal Society of Chemistry 2007

N3A N -0.1670(4) 0.9340(4) 0.22790(18) 0.0270(10) Uani 1 1 d . . .  
C4A C -0.2313(4) 0.9384(5) 0.1780(2) 0.0211(11) Uani 1 1 d . . .  
C5A C -0.3528(4) 0.9717(5) 0.1665(2) 0.0197(11) Uani 1 1 d . . .  
C6A C -0.4237(5) 1.0001(5) 0.2099(2) 0.0257(12) Uani 1 1 d . . .  
N6A N -0.5403(4) 1.0298(6) 0.2052(2) 0.0400(14) Uani 1 1 d . . .  
H6A1 H -0.579(5) 1.049(6) 0.168(3) 0.048 Uiso 1 1 d . . .  
H6A2 H -0.579(6) 1.032(6) 0.233(3) 0.048 Uiso 1 1 d . . .  
N7A N -0.3794(4) 0.9664(4) 0.11077(19) 0.0251(10) Uani 1 1 d . . .  
H7A H -0.440(5) 0.990(5) 0.087(2) 0.030 Uiso 1 1 d . . .  
C8A C -0.2774(4) 0.9303(5) 0.0897(2) 0.0226(11) Uani 1 1 d . . .  
H8A H -0.271(4) 0.917(5) 0.052(2) 0.027 Uiso 1 1 d . . .  
N9A N -0.1844(3) 0.9109(4) 0.12926(16) 0.0193(9) Uani 1 1 d . . .  
N1B N 0.3373(4) 0.7527(4) -0.02714(18) 0.0234(10) Uani 1 1 d . . .  
H1B H 0.374(5) 0.747(5) -0.054(2) 0.028 Uiso 1 1 d . . .  
C2B C 0.2175(5) 0.7896(5) -0.0333(2) 0.0232(11) Uani 1 1 d . . .  
H2B H 0.187(4) 0.798(5) -0.072(2) 0.028 Uiso 1 1 d . . .  
N3B N 0.1495(3) 0.8130(4) 0.00659(17) 0.0207(9) Uani 1 1 d . . .  
C4B C 0.2114(4) 0.7958(4) 0.0569(2) 0.0187(10) Uani 1 1 d . . .  
C5B C 0.3338(4) 0.7613(4) 0.06652(19) 0.0187(10) Uani 1 1 d . . .  
N6B N 0.5164(4) 0.6969(5) 0.0253(2) 0.0314(12) Uani 1 1 d . . .  
H6B1 H 0.550(5) 0.681(6) 0.053(3) 0.038 Uiso 1 1 d . . .  
H6B2 H 0.555(5) 0.684(6) -0.002(3) 0.038 Uiso 1 1 d . . .  
C6B C 0.4024(4) 0.7356(5) 0.0225(2) 0.0245(12) Uani 1 1 d . . .  
N7B N 0.3596(4) 0.7568(4) 0.12277(18) 0.0213(10) Uani 1 1 d . . .  
H7B H 0.423(5) 0.738(5) 0.136(2) 0.026 Uiso 1 1 d . . .  
C8B C 0.2566(4) 0.7873(5) 0.1444(2) 0.0214(11) Uani 1 1 d . . .  
H8B H 0.256(5) 0.791(5) 0.180(2) 0.026 Uiso 1 1 d . . .  
N9B N 0.1646(3) 0.8112(4) 0.10657(17) 0.0199(9) Uani 1 1 d . . .  
N11 N -0.0603(3) 0.6864(4) 0.10361(17) 0.0211(9) Uani 1 1 d . . .  
N12 N -0.1141(4) 0.4432(4) 0.0856(2) 0.0358(12) Uani 1 1 d . . .  
C11 C -0.0442(4) 0.6055(5) 0.1445(2) 0.0244(12) Uani 1 1 d . . .  
H11 H -0.0135 0.6311 0.1802 0.029 Uiso 1 1 calc R . .  
C12 C -0.0722(5) 0.4849(5) 0.1347(2) 0.0272(12) Uani 1 1 d . . .  
H12 H -0.0610 0.4293 0.1643 0.033 Uiso 1 1 calc R . .  
C13 C -0.1302(5) 0.5253(6) 0.0457(3) 0.0371(15) Uani 1 1 d . . .  
H13 H -0.1600 0.4991 0.0100 0.045 Uiso 1 1 calc R . .  
C14 C -0.1053(4) 0.6467(5) 0.0542(2) 0.0282(12) Uani 1 1 d . . .  
H14 H -0.1203 0.7024 0.0248 0.034 Uiso 1 1 calc R . .  
N21 N 0.0478(3) 1.0288(4) 0.13620(17) 0.0207(9) Uani 1 1 d . . .  
N22 N 0.1364(4) 1.2596(4) 0.1603(2) 0.0328(11) Uani 1 1 d . . .  
C21 C 0.0942(5) 1.0579(5) 0.1876(2) 0.0264(12) Uani 1 1 d . . .  
H21 H 0.0972 0.9991 0.2160 0.032 Uiso 1 1 calc R . .  
C22 C 0.1369(5) 1.1730(5) 0.1985(2) 0.0345(14) Uani 1 1 d . . .  
H22 H 0.1683 1.1922 0.2349 0.041 Uiso 1 1 calc R . .  
C23 C 0.0902(5) 1.2284(5) 0.1104(2) 0.0283(12) Uani 1 1 d . . .  
H23 H 0.0870 1.2876 0.0822 0.034 Uiso 1 1 calc R . .  
C24 C 0.0461(4) 1.1127(5) 0.0974(2) 0.0225(11) Uani 1 1 d . . .  
H24 H 0.0148 1.0938 0.0609 0.027 Uiso 1 1 calc R . .  
N31 N 0.1925(4) 0.7563(4) -0.21312(19) 0.0298(11) Uani 1 1 d . . .  
O31 O 0.3037(3) 0.7463(4) -0.22191(16) 0.0398(11) Uani 1 1 d . . .  
O32 O 0.1668(4) 0.7915(4) -0.16699(16) 0.0365(10) Uani 1 1 d . . .  
O33 O 0.1094(4) 0.7309(4) -0.24969(17) 0.0443(11) Uani 1 1 d . . .  
N41 N 0.6840(4) 0.5390(5) -0.09333(19) 0.0327(11) Uani 1 1 d . . .  
O41 O 0.6714(4) 0.5982(6) -0.05168(19) 0.0735(19) Uani 1 1 d . . .  
O42 O 0.5942(3) 0.5321(4) -0.12984(16) 0.0398(11) Uani 1 1 d . . .  
O43 O 0.7818(3) 0.4858(4) -0.09946(16) 0.0358(10) Uani 1 1 d . . .  
N51 N -0.6680(4) 1.0764(5) 0.05835(19) 0.0307(11) Uani 1 1 d . . .  
O51 O -0.5704(3) 1.0456(4) 0.03849(16) 0.0414(11) Uani 1 1 d . . .  
O52 O -0.6824(3) 1.0515(4) 0.10693(16) 0.0369(10) Uani 1 1 d . . .  
O53 O -0.7501(4) 1.1277(5) 0.02856(17) 0.0583(15) Uani 1 1 d . . .  
N61 N 0.6375(4) 0.6247(5) 0.1722(2) 0.0332(12) Uani 1 1 d . . .  
O61 O 0.5488(3) 0.6782(4) 0.19233(16) 0.0404(11) Uani 1 1 d . . .  
O62 O 0.6631(3) 0.6539(5) 0.12513(17) 0.0479(12) Uani 1 1 d . . .  
O63 O 0.6972(4) 0.5489(5) 0.19978(18) 0.0494(13) Uani 1 1 d . . .

Supplementary Material (ESI) for Dalton Transactions  
This journal is (c) The Royal Society of Chemistry 2007

loop\_

\_atom\_site\_aniso\_label

\_atom\_site\_aniso\_U\_11

\_atom\_site\_aniso\_U\_22

\_atom\_site\_aniso\_U\_33

\_atom\_site\_aniso\_U\_23

\_atom\_site\_aniso\_U\_13

\_atom\_site\_aniso\_U\_12

Pt 0.01741(10) 0.01836(10) 0.01860(10) -0.00042(9) 0.00480(7) 0.00104(8)

OW 0.034(2) 0.061(4) 0.026(2) -0.002(2) 0.0050(18) 0.015(2)

N1A 0.034(3) 0.029(3) 0.019(2) 0.001(2) 0.0103(19) 0.005(2)

C2A 0.033(3) 0.031(3) 0.020(3) 0.008(2) 0.006(2) 0.005(2)

N3A 0.027(2) 0.033(3) 0.020(2) 0.005(2) 0.0021(18) 0.005(2)

C4A 0.028(3) 0.020(3) 0.016(3) 0.004(2) 0.003(2) 0.003(2)

C5A 0.021(2) 0.017(3) 0.022(3) 0.002(2) 0.004(2) 0.0009(19)

C6A 0.027(3) 0.030(3) 0.022(3) -0.002(2) 0.008(2) 0.001(2)

N6A 0.028(3) 0.070(4) 0.023(3) 0.006(3) 0.013(2) 0.017(3)

N7A 0.017(2) 0.033(3) 0.026(3) 0.000(2) 0.0036(17) 0.0049(19)

C8A 0.023(2) 0.027(3) 0.019(3) -0.004(2) 0.005(2) 0.000(2)

N9A 0.020(2) 0.020(2) 0.017(2) -0.0016(18) 0.0029(16) 0.0005(17)

N1B 0.026(2) 0.027(3) 0.018(2) -0.003(2) 0.0073(18) 0.0009(19)

C2B 0.028(3) 0.026(3) 0.015(3) -0.004(2) 0.001(2) 0.001(2)

N3B 0.021(2) 0.023(2) 0.018(2) -0.0045(19) 0.0016(16) -0.0016(17)

C4B 0.019(2) 0.015(3) 0.023(3) -0.001(2) 0.0047(19) -0.0007(19)

C5B 0.024(2) 0.017(3) 0.015(2) 0.002(2) 0.0061(19) -0.003(2)

N6B 0.025(2) 0.047(3) 0.024(3) 0.002(3) 0.009(2) 0.006(2)

C6B 0.022(2) 0.023(3) 0.029(3) 0.001(2) 0.005(2) 0.002(2)

N7B 0.016(2) 0.027(3) 0.021(2) 0.001(2) 0.0032(17) 0.0012(18)

C8B 0.024(3) 0.025(3) 0.016(3) -0.002(2) 0.001(2) 0.004(2)

N9B 0.018(2) 0.019(2) 0.023(2) 0.0019(19) 0.0055(17) -0.0001(17)

N11 0.0146(19) 0.024(2) 0.026(2) -0.003(2) 0.0062(17) 0.0004(17)

N12 0.039(3) 0.027(3) 0.041(3) -0.005(2) 0.000(2) 0.000(2)

C11 0.024(3) 0.026(3) 0.024(3) -0.003(2) 0.006(2) -0.003(2)

C12 0.032(3) 0.018(3) 0.032(3) 0.009(2) 0.005(2) 0.000(2)

C13 0.035(3) 0.041(4) 0.034(3) -0.010(3) -0.005(3) 0.000(3)

C14 0.029(3) 0.028(3) 0.028(3) 0.001(3) 0.000(2) 0.000(2)

N21 0.016(2) 0.026(3) 0.021(2) 0.0027(19) 0.0047(16) 0.0015(17)

N22 0.037(3) 0.029(3) 0.033(3) -0.006(2) 0.005(2) -0.002(2)

C21 0.028(3) 0.029(3) 0.022(3) -0.002(2) 0.000(2) -0.001(2)

C22 0.041(3) 0.035(4) 0.027(3) -0.007(3) 0.003(2) -0.002(3)

C23 0.031(3) 0.024(3) 0.032(3) 0.005(2) 0.012(2) 0.003(2)

C24 0.025(3) 0.022(3) 0.023(3) -0.001(2) 0.009(2) 0.004(2)

N31 0.034(3) 0.025(3) 0.030(3) 0.002(2) 0.005(2) -0.005(2)

O31 0.033(2) 0.057(3) 0.030(2) -0.001(2) 0.0078(17) 0.000(2)

O32 0.047(2) 0.041(3) 0.023(2) -0.0038(19) 0.0115(18) 0.0009(19)

O33 0.035(2) 0.064(3) 0.032(2) -0.012(2) -0.0035(18) -0.004(2)

N41 0.035(3) 0.040(3) 0.024(3) 0.004(2) 0.007(2) 0.007(2)

O41 0.053(3) 0.132(5) 0.034(3) -0.037(3) -0.005(2) 0.040(3)

O42 0.035(2) 0.057(3) 0.027(2) -0.009(2) 0.0010(17) 0.007(2)

O43 0.033(2) 0.036(3) 0.040(2) -0.001(2) 0.0120(18) 0.0074(18)

N51 0.027(2) 0.035(3) 0.030(3) 0.000(2) 0.001(2) 0.004(2)

O51 0.029(2) 0.065(3) 0.031(2) -0.001(2) 0.0077(17) 0.013(2)

O52 0.031(2) 0.052(3) 0.027(2) 0.009(2) 0.0054(16) -0.0024(19)

O53 0.047(3) 0.102(4) 0.027(2) 0.014(3) 0.0105(19) 0.040(3)

N61 0.025(2) 0.043(3) 0.031(3) 0.008(2) 0.000(2) -0.004(2)

O61 0.032(2) 0.057(3) 0.032(2) 0.003(2) 0.0040(17) 0.014(2)

O62 0.030(2) 0.084(4) 0.031(2) 0.021(2) 0.0066(17) -0.001(2)

O63 0.043(2) 0.067(3) 0.039(3) 0.021(2) 0.007(2) 0.024(2)

\_geom\_special\_details

;

All esds (except the esd in the dihedral angle between two l.s. planes) are estimated using the full covariance matrix. The cell esds are taken into account individually in the estimation of esds in distances, angles and torsion angles; correlations between esds in cell parameters are only



Supplementary Material (ESI) for Dalton Transactions

This journal is (c) The Royal Society of Chemistry 2007

used when they are defined by crystal symmetry. An approximate (isotropic) treatment of cell esds is used for estimating esds involving l.s. planes.

;

loop\_

\_geom\_bond\_atom\_site\_label\_1

\_geom\_bond\_atom\_site\_label\_2

\_geom\_bond\_distance

\_geom\_bond\_site\_symmetry\_2

\_geom\_bond\_publ\_flag

Pt N21 2.006(4) . ?

Pt N11 2.013(4) . ?

Pt N9B 2.020(4) . ?

Pt N9A 2.025(4) . ?

OW H1OW 0.84(7) . ?

OW H2OW 0.73(7) . ?

N1A C2A 1.363(7) . ?

N1A C6A 1.369(7) . ?

N1A H1A 0.84(6) . ?

C2A N3A 1.304(7) . ?

C2A H2A 0.94(6) . ?

N3A C4A 1.352(6) . ?

C4A C5A 1.376(7) . ?

C4A N9A 1.376(6) . ?

C5A N7A 1.370(6) . ?

C5A C6A 1.409(7) . ?

C6A N6A 1.306(7) . ?

N6A H6A1 0.98(7) . ?

N6A H6A2 0.83(6) . ?

N7A C8A 1.330(6) . ?

N7A H7A 0.87(6) . ?

C8A N9A 1.349(6) . ?

C8A H8A 0.94(5) . ?

N1B C6B 1.361(7) . ?

N1B C2B 1.361(6) . ?

N1B H1B 0.81(6) . ?

C2B N3B 1.308(6) . ?

C2B H2B 0.98(5) . ?

N3B C4B 1.362(6) . ?

C4B N9B 1.375(6) . ?

C4B C5B 1.385(6) . ?

C5B N7B 1.382(6) . ?

C5B C6B 1.400(7) . ?

N6B C6B 1.308(7) . ?

N6B H6B1 0.75(6) . ?

N6B H6B2 0.82(6) . ?

N7B C8B 1.330(6) . ?

N7B H7B 0.76(5) . ?

C8B N9B 1.325(6) . ?

C8B H8B 0.87(5) . ?

N11 C14 1.337(7) . ?

N11 C11 1.342(7) . ?

N12 C12 1.328(7) . ?

N12 C13 1.331(8) . ?

C11 C12 1.383(7) . ?

C11 H11 0.9500 . ?

C12 H12 0.9500 . ?

C13 C14 1.379(8) . ?

C13 H13 0.9500 . ?

C14 H14 0.9500 . ?

N21 C24 1.327(6) . ?

N21 C21 1.351(6) . ?

N22 C23 1.325(7) . ?

N22 C22 1.337(7) . ?

C21 C22 1.370(8) . ?

Supplementary Material (ESI) for Dalton Transactions  
This journal is (c) The Royal Society of Chemistry 2007

C21 H21 0.9500 . ?  
C22 H22 0.9500 . ?  
C23 C24 1.390(7) . ?  
C23 H23 0.9500 . ?  
C24 H24 0.9500 . ?  
N31 O33 1.243(6) . ?  
N31 O32 1.252(6) . ?  
N31 O31 1.255(6) . ?  
N41 O41 1.231(6) . ?  
N41 O43 1.238(6) . ?  
N41 O42 1.263(6) . ?  
N51 O53 1.236(6) . ?  
N51 O52 1.247(6) . ?  
N51 O51 1.257(5) . ?  
N61 O63 1.223(6) . ?  
N61 O62 1.256(6) . ?  
N61 O61 1.271(6) . ?

loop\_

\_geom\_angle\_atom\_site\_label\_1  
\_geom\_angle\_atom\_site\_label\_2  
\_geom\_angle\_atom\_site\_label\_3  
\_geom\_angle  
\_geom\_angle\_site\_symmetry\_1  
\_geom\_angle\_site\_symmetry\_3  
\_geom\_angle\_publ\_flag  
N21 Pt N11 177.02(16) . . ?  
N21 Pt N9B 89.91(16) . . ?  
N11 Pt N9B 88.10(16) . . ?  
N21 Pt N9A 89.38(16) . . ?  
N11 Pt N9A 92.65(16) . . ?  
N9B Pt N9A 178.65(17) . . ?  
H1OW OW H2OW 113(7) . . ?  
C2A N1A C6A 123.8(4) . . ?  
C2A N1A H1A 118(4) . . ?  
C6A N1A H1A 118(4) . . ?  
N3A C2A N1A 125.3(5) . . ?  
N3A C2A H2A 121(3) . . ?  
N1A C2A H2A 113(3) . . ?  
C2A N3A C4A 112.2(4) . . ?  
N3A C4A C5A 126.8(5) . . ?  
N3A C4A N9A 125.1(4) . . ?  
C5A C4A N9A 108.1(4) . . ?  
N7A C5A C4A 107.5(4) . . ?  
N7A C5A C6A 133.2(5) . . ?  
C4A C5A C6A 119.3(5) . . ?  
N6A C6A N1A 121.6(5) . . ?  
N6A C6A C5A 126.0(5) . . ?  
N1A C6A C5A 112.4(4) . . ?  
C6A N6A H6A1 118(4) . . ?  
C6A N6A H6A2 120(5) . . ?  
H6A1 N6A H6A2 122(6) . . ?  
C8A N7A C5A 107.1(4) . . ?  
C8A N7A H7A 116(4) . . ?  
C5A N7A H7A 136(4) . . ?  
N7A C8A N9A 111.5(5) . . ?  
N7A C8A H8A 125(3) . . ?  
N9A C8A H8A 124(3) . . ?  
C8A N9A C4A 105.9(4) . . ?  
C8A N9A Pt 126.9(3) . . ?  
C4A N9A Pt 127.2(3) . . ?  
C6B N1B C2B 123.5(4) . . ?  
C6B N1B H1B 118(4) . . ?  
C2B N1B H1B 118(4) . . ?  
N3B C2B N1B 125.5(5) . . ?

Supplementary Material (ESI) for Dalton Transactions  
This journal is (c) The Royal Society of Chemistry 2007

N3B C2B H2B 123(3) . . ?  
N1B C2B H2B 112(3) . . ?  
C2B N3B C4B 112.6(4) . . ?  
N3B C4B N9B 126.3(4) . . ?  
N3B C4B C5B 125.2(4) . . ?  
N9B C4B C5B 108.5(4) . . ?  
N7B C5B C4B 106.2(4) . . ?  
N7B C5B C6B 133.7(5) . . ?  
C4B C5B C6B 120.0(5) . . ?  
C6B N6B H6B1 120(5) . . ?  
C6B N6B H6B2 124(4) . . ?  
H6B1 N6B H6B2 116(6) . . ?  
N6B C6B N1B 120.2(5) . . ?  
N6B C6B C5B 126.7(5) . . ?  
N1B C6B C5B 113.0(4) . . ?  
C8B N7B C5B 106.9(4) . . ?  
C8B N7B H7B 131(4) . . ?  
C5B N7B H7B 122(4) . . ?  
N9B C8B N7B 112.4(5) . . ?  
N9B C8B H8B 128(3) . . ?  
N7B C8B H8B 120(3) . . ?  
C8B N9B C4B 106.0(4) . . ?  
C8B N9B Pt 127.4(3) . . ?  
C4B N9B Pt 126.5(3) . . ?  
C14 N11 C11 118.0(5) . . ?  
C14 N11 Pt 123.1(4) . . ?  
C11 N11 Pt 118.8(3) . . ?  
C12 N12 C13 116.0(5) . . ?  
N11 C11 C12 120.0(5) . . ?  
N11 C11 H11 120.0 . . ?  
C12 C11 H11 120.0 . . ?  
N12 C12 C11 122.9(5) . . ?  
N12 C12 H12 118.6 . . ?  
C11 C12 H12 118.6 . . ?  
N12 C13 C14 122.8(6) . . ?  
N12 C13 H13 118.6 . . ?  
C14 C13 H13 118.6 . . ?  
N11 C14 C13 120.3(5) . . ?  
N11 C14 H14 119.8 . . ?  
C13 C14 H14 119.8 . . ?  
C24 N21 C21 118.8(5) . . ?  
C24 N21 Pt 120.9(4) . . ?  
C21 N21 Pt 120.3(4) . . ?  
C23 N22 C22 115.9(5) . . ?  
N21 C21 C22 119.4(5) . . ?  
N21 C21 H21 120.3 . . ?  
C22 C21 H21 120.3 . . ?  
N22 C22 C21 123.3(5) . . ?  
N22 C22 H22 118.4 . . ?  
C21 C22 H22 118.4 . . ?  
N22 C23 C24 122.9(5) . . ?  
N22 C23 H23 118.6 . . ?  
C24 C23 H23 118.6 . . ?

Supplementary Material (ESI) for Dalton Transactions  
This journal is (c) The Royal Society of Chemistry 2007  
Atomic coordinates of **3**, *head-to-head* conformer:

|     |              |              |              |     |    |   |
|-----|--------------|--------------|--------------|-----|----|---|
| N1  | -1.612539887 | 0.655478807  | -0.686839593 | XXX | ND | n |
| N   | 0.000        |              |              |     |    |   |
| C2  | -2.394973489 | -0.306388052 | -1.272956772 | XXX | ND | c |
| C   | 0.000        |              |              |     |    |   |
| C3  | -3.305125994 | 0.369820584  | -2.091148700 | XXX | ND | c |
| C   | 0.000        |              |              |     |    |   |
| N4  | -3.105542059 | 1.729127696  | -2.017639899 | XXX | ND | n |
| N   | 0.000        |              |              |     |    |   |
| C5  | -2.098698172 | 1.840949461  | -1.179488144 | XXX | ND | c |
| C   | 0.000        |              |              |     |    |   |
| C6  | -4.214382771 | -0.420592906 | -2.812185787 | XXX | ND | c |
| C   | 0.000        |              |              |     |    |   |
| N7  | -4.166925498 | -1.751787313 | -2.674492843 | XXX | ND | n |
| N   | 0.000        |              |              |     |    |   |
| C8  | -3.260087966 | -2.273216115 | -1.838865516 | XXX | ND | c |
| C   | 0.000        |              |              |     |    |   |
| N9  | -2.351753291 | -1.639908735 | -1.103743383 | XXX | ND | n |
| N   | 0.000        |              |              |     |    |   |
| N10 | -5.156039999 | 0.120976933  | -3.624433555 | XXX | ND | n |
| N   | 0.000        |              |              |     |    |   |
| H11 | -5.080100908 | 1.093802494  | -3.865933344 | XXX | ND | h |
| H   | 0.000        |              |              |     |    |   |
| H12 | -5.655263517 | -0.496920257 | -4.240801898 | XXX | ND | h |
| H   | 0.000        |              |              |     |    |   |
| H13 | -1.671896590 | 2.787016595  | -0.881560530 | XXX | ND | h |
| H   | 0.000        |              |              |     |    |   |
| H14 | -3.273823940 | -3.355594162 | -1.754947570 | XXX | ND | h |
| H   | 0.000        |              |              |     |    |   |
| N15 | 2.244294141  | 1.542696248  | -2.831589392 | XXX | ND | n |
| N   | 0.000        |              |              |     |    |   |
| C16 | 1.300884447  | 1.650188533  | -1.922518043 | XXX | ND | c |
| C   | 0.000        |              |              |     |    |   |
| N17 | 1.255965075  | 0.630181265  | -1.003811070 | XXX | ND | n |
| N   | 0.000        |              |              |     |    |   |
| C18 | 2.271630186  | -0.216344960 | -1.378044901 | XXX | ND | c |
| C   | 0.000        |              |              |     |    |   |
| C19 | 2.868975399  | 0.361912725  | -2.502557005 | XXX | ND | c |
| C   | 0.000        |              |              |     |    |   |
| C20 | 3.940603389  | -0.336553252 | -3.080423361 | XXX | ND | c |
| C   | 0.000        |              |              |     |    |   |
| N21 | 4.327611464  | -1.495989702 | -2.534926569 | XXX | ND | n |
| N   | 0.000        |              |              |     |    |   |
| C22 | 3.675548982  | -1.936110343 | -1.450981504 | XXX | ND | c |
| C   | 0.000        |              |              |     |    |   |
| N23 | 2.656749486  | -1.372877652 | -0.811005364 | XXX | ND | n |
| N   | 0.000        |              |              |     |    |   |
| N24 | -3.115981004 | -0.459201498 | 4.197307023  | XXX | ND | n |
| N   | 0.000        |              |              |     |    |   |
| C25 | -3.083578192 | -1.229952407 | 3.114391583  | XXX | ND | c |
| C   | 0.000        |              |              |     |    |   |

Supplementary Material (ESI) for Dalton Transactions  
This journal is (c) The Royal Society of Chemistry 2007

|      |              |              |              |     |    |    |
|------|--------------|--------------|--------------|-----|----|----|
| C26  | -2.211085771 | -1.003427512 | 2.055456849  | XXX | ND | c  |
| C    | 0.000        |              |              |     |    |    |
| N27  | -1.347474837 | 0.022843283  | 2.101768970  | XXX | ND | n  |
| N    | 0.000        |              |              |     |    |    |
| C28  | -1.374900391 | 0.811063170  | 3.187158261  | XXX | ND | c  |
| C    | 0.000        |              |              |     |    |    |
| C29  | -2.261998599 | 0.561901466  | 4.222743420  | XXX | ND | c  |
| C    | 0.000        |              |              |     |    |    |
| PT30 | -0.028206823 | 0.353626502  | 0.528125796  | XXX | ND | pt |
| Pt   | 0.000        |              |              |     |    |    |
| N31  | 1.606118244  | 0.029330297  | 1.753174513  | XXX | ND | n  |
| N    | 0.000        |              |              |     |    |    |
| C32  | 1.891159118  | -1.197353166 | 2.209350534  | XXX | ND | c  |
| C    | 0.000        |              |              |     |    |    |
| C33  | 3.006293947  | -1.411754444 | 3.007215118  | XXX | ND | c  |
| C    | 0.000        |              |              |     |    |    |
| N34  | 3.846689418  | -0.435425993 | 3.336536852  | XXX | ND | n  |
| N    | 0.000        |              |              |     |    |    |
| C35  | 3.569339757  | 0.772999850  | 2.853338551  | XXX | ND | c  |
| C    | 0.000        |              |              |     |    |    |
| C36  | 2.456524957  | 1.018693046  | 2.062599450  | XXX | ND | c  |
| C    | 0.000        |              |              |     |    |    |
| N37  | 4.616636509  | 0.141293639  | -4.157069987 | XXX | ND | n  |
| N    | 0.000        |              |              |     |    |    |
| H38  | 4.209535672  | 0.900479303  | -4.675700775 | XXX | ND | h  |
| H    | 0.000        |              |              |     |    |    |
| H39  | 5.242092738  | -0.487821294 | -4.630862715 | XXX | ND | h  |
| H    | 0.000        |              |              |     |    |    |
| H40  | 0.598182728  | 2.467581263  | -1.887233069 | XXX | ND | h  |
| H    | 0.000        |              |              |     |    |    |
| H41  | 4.032373981  | -2.879130380 | -1.047700016 | XXX | ND | h  |
| H    | 0.000        |              |              |     |    |    |
| H42  | -3.775177743 | -2.062991699 | 3.072522292  | XXX | ND | h  |
| H    | 0.000        |              |              |     |    |    |
| H43  | -2.203396233 | -1.615062476 | 1.159187815  | XXX | ND | h  |
| H    | 0.000        |              |              |     |    |    |
| H44  | -0.685055408 | 1.641949658  | 3.215451137  | XXX | ND | h  |
| H    | 0.000        |              |              |     |    |    |
| H45  | -2.279308898 | 1.208228386  | 5.092535847  | XXX | ND | h  |
| H    | 0.000        |              |              |     |    |    |
| H46  | 1.232940923  | -2.001085395 | 1.916685733  | XXX | ND | h  |
| H    | 0.000        |              |              |     |    |    |
| H47  | 3.224894170  | -2.406808252 | 3.375978971  | XXX | ND | h  |
| H    | 0.000        |              |              |     |    |    |
| H48  | 4.251952561  | 1.578857293  | 3.096022134  | XXX | ND | h  |
| H    | 0.000        |              |              |     |    |    |
| H49  | 2.241887298  | 1.998796882  | 1.662297010  | XXX | ND | h  |
| H    | 0.000        |              |              |     |    |    |
| end  |              |              |              |     |    |    |
| end  |              |              |              |     |    |    |

Supplementary Material (ESI) for Dalton Transactions  
This journal is (c) The Royal Society of Chemistry 2007

Atomic coordinates of **3**, *head-to-tail* conformer:

|     |              |              |              |     |    |   |
|-----|--------------|--------------|--------------|-----|----|---|
| N1  | -0.930734288 | -0.452005645 | 1.332638387  | XXX | ND | n |
| N   | 0.000        |              |              |     |    |   |
| C2  | -1.318051267 | 0.279947036  | 2.425248133  | XXX | ND | c |
| C   | 0.000        |              |              |     |    |   |
| C3  | -2.425215322 | -0.380435806 | 2.967323034  | XXX | ND | c |
| C   | 0.000        |              |              |     |    |   |
| N4  | -2.731022157 | -1.499974301 | 2.229047472  | XXX | ND | n |
| N   | 0.000        |              |              |     |    |   |
| C5  | -1.825952764 | -1.492191882 | 1.275073836  | XXX | ND | c |
| C   | 0.000        |              |              |     |    |   |
| C6  | -3.015459992 | 0.199877086  | 4.101176541  | XXX | ND | c |
| C   | 0.000        |              |              |     |    |   |
| N7  | -2.500832318 | 1.336973480  | 4.590210015  | XXX | ND | n |
| N   | 0.000        |              |              |     |    |   |
| C8  | -1.431593163 | 1.863676788  | 3.982277392  | XXX | ND | c |
| C   | 0.000        |              |              |     |    |   |
| N9  | -0.779180097 | 1.412466194  | 2.914617104  | XXX | ND | n |
| N   | 0.000        |              |              |     |    |   |
| N10 | -4.080650997 | -0.359871746 | 4.727709629  | XXX | ND | n |
| N   | 0.000        |              |              |     |    |   |
| H11 | -4.569226878 | -1.110216884 | 4.269921675  | XXX | ND | h |
| H   | 0.000        |              |              |     |    |   |
| H12 | -4.560121337 | 0.185693920  | 5.423359039  | XXX | ND | h |
| H   | 0.000        |              |              |     |    |   |
| H13 | -1.769972414 | -2.230395254 | 0.489399067  | XXX | ND | h |
| H   | 0.000        |              |              |     |    |   |
| H14 | -1.053084433 | 2.781957787  | 4.421462739  | XXX | ND | h |
| H   | 0.000        |              |              |     |    |   |
| N15 | -2.732554454 | 1.487917027  | -2.228878393 | XXX | ND | n |
| N   | 0.000        |              |              |     |    |   |
| C16 | -1.830358911 | 1.477584408  | -1.272178105 | XXX | ND | c |
| C   | 0.000        |              |              |     |    |   |
| N17 | -0.927494983 | 0.444148150  | -1.336613399 | XXX | ND | n |
| N   | 0.000        |              |              |     |    |   |
| C18 | -1.304110089 | -0.277486139 | -2.440076786 | XXX | ND | c |
| C   | 0.000        |              |              |     |    |   |
| C19 | -2.414990799 | 0.379367229  | -2.978363779 | XXX | ND | c |
| C   | 0.000        |              |              |     |    |   |
| C20 | -2.997594231 | -0.193991591 | -4.119655798 | XXX | ND | c |
| C   | 0.000        |              |              |     |    |   |
| N21 | -2.469943450 | -1.319242993 | -4.621918164 | XXX | ND | n |
| N   | 0.000        |              |              |     |    |   |
| C22 | -1.398715948 | -1.843754704 | -4.015992157 | XXX | ND | c |
| C   | 0.000        |              |              |     |    |   |
| N23 | -0.754599670 | -1.400203208 | -2.940117962 | XXX | ND | n |
| N   | 0.000        |              |              |     |    |   |
| N24 | 3.915422906  | -1.245471749 | 3.239790809  | XXX | ND | n |
| N   | 0.000        |              |              |     |    |   |
| C25 | 3.752373533  | -1.907858387 | 2.095809111  | XXX | ND | c |
| C   | 0.000        |              |              |     |    |   |

Supplementary Material (ESI) for Dalton Transactions  
This journal is (c) The Royal Society of Chemistry 2007

|      |              |              |              |     |    |    |
|------|--------------|--------------|--------------|-----|----|----|
| C26  | 2.787506905  | -1.554432174 | 1.166084792  | XXX | ND | c  |
| C    | 0.000        |              |              |     |    |    |
| N27  | 1.964751436  | -0.517733680 | 1.389717522  | XXX | ND | n  |
| N    | 0.000        |              |              |     |    |    |
| C28  | 2.106903263  | 0.150447504  | 2.545650015  | XXX | ND | c  |
| C    | 0.000        |              |              |     |    |    |
| C29  | 3.089735770  | -0.225574547 | 3.454746465  | XXX | ND | c  |
| C    | 0.000        |              |              |     |    |    |
| PT30 | 0.512208185  | -0.004160131 | 0.000067949  | XXX | ND | pt |
| Pt   | 0.000        |              |              |     |    |    |
| N31  | 1.974243389  | 0.515361023  | -1.376779829 | XXX | ND | n  |
| N    | 0.000        |              |              |     |    |    |
| C32  | 2.114273191  | -0.131879155 | -2.545174793 | XXX | ND | c  |
| C    | 0.000        |              |              |     |    |    |
| C33  | 3.104961623  | 0.253493068  | -3.441688375 | XXX | ND | c  |
| C    | 0.000        |              |              |     |    |    |
| N34  | 3.941562390  | 1.259092766  | -3.203038729 | XXX | ND | n  |
| N    | 0.000        |              |              |     |    |    |
| C35  | 3.780984416  | 1.899443558  | -2.046387292 | XXX | ND | c  |
| C    | 0.000        |              |              |     |    |    |
| C36  | 2.807646109  | 1.539242888  | -1.128135738 | XXX | ND | c  |
| C    | 0.000        |              |              |     |    |    |
| N37  | -4.064274636 | 0.363958009  | -4.742485737 | XXX | ND | n  |
| N    | 0.000        |              |              |     |    |    |
| H38  | -4.560953436 | 1.102891839  | -4.276159642 | XXX | ND | h  |
| H    | 0.000        |              |              |     |    |    |
| H39  | -4.537177601 | -0.178142812 | -5.444358444 | XXX | ND | h  |
| H    | 0.000        |              |              |     |    |    |
| H40  | -1.783324219 | 2.207034825  | -0.477739682 | XXX | ND | h  |
| H    | 0.000        |              |              |     |    |    |
| H41  | -1.009173810 | -2.752411699 | -4.465520390 | XXX | ND | h  |
| H    | 0.000        |              |              |     |    |    |
| H42  | 4.407408978  | -2.750336982 | 1.906528328  | XXX | ND | h  |
| H    | 0.000        |              |              |     |    |    |
| H43  | 2.658394519  | -2.098591468 | 0.241316054  | XXX | ND | h  |
| H    | 0.000        |              |              |     |    |    |
| H44  | 1.404826917  | 0.954216388  | 2.737134323  | XXX | ND | h  |
| H    | 0.000        |              |              |     |    |    |
| H45  | 3.201890598  | 0.321929892  | 4.383399472  | XXX | ND | h  |
| H    | 0.000        |              |              |     |    |    |
| H46  | 1.407854455  | -0.928206576 | -2.753934986 | XXX | ND | h  |
| H    | 0.000        |              |              |     |    |    |
| H47  | 3.214009925  | -0.274488055 | -4.381742712 | XXX | ND | h  |
| H    | 0.000        |              |              |     |    |    |
| H48  | 4.445066747  | 2.729980842  | -1.836834799 | XXX | ND | h  |
| H    | 0.000        |              |              |     |    |    |
| H49  | 2.679807346  | 2.068354845  | -0.193359469 | XXX | ND | h  |
| H    | 0.000        |              |              |     |    |    |
| end  |              |              |              |     |    |    |
| end  |              |              |              |     |    |    |

Supplementary Material (ESI) for Dalton Transactions  
This journal is (c) The Royal Society of Chemistry 2007  
Atomic coordinates of **2**, *head-to-head* conformer:

|      |              |              |              |     |    |    |
|------|--------------|--------------|--------------|-----|----|----|
| N1   | -0.000301732 | 1.246368537  | -4.206637155 | XXX | ND | n  |
| N    | 0.000        |              |              |     |    |    |
| C2   | -0.000179851 | 1.592885120  | -2.935491156 | XXX | ND | c  |
| C    | 0.000        |              |              |     |    |    |
| N3   | -0.000187850 | 0.551311568  | -2.044160926 | XXX | ND | n  |
| N    | 0.000        |              |              |     |    |    |
| C4   | -0.000330081 | -0.570772680 | -2.829451204 | XXX | ND | c  |
| C    | 0.000        |              |              |     |    |    |
| C5   | -0.000387905 | -0.128666804 | -4.156255923 | XXX | ND | c  |
| C    | 0.000        |              |              |     |    |    |
| C6   | -0.000484294 | -1.121953327 | -5.150336536 | XXX | ND | c  |
| C    | 0.000        |              |              |     |    |    |
| N7   | -0.000489661 | -2.408567392 | -4.778675312 | XXX | ND | n  |
| N    | 0.000        |              |              |     |    |    |
| C8   | -0.000417130 | -2.695242658 | -3.468902497 | XXX | ND | c  |
| C    | 0.000        |              |              |     |    |    |
| N9   | -0.000335005 | -1.857747477 | -2.438029762 | XXX | ND | n  |
| N    | 0.000        |              |              |     |    |    |
| N10  | -4.797370920 | 0.228070675  | 0.000632889  | XXX | ND | n  |
| N    | 0.000        |              |              |     |    |    |
| C11  | -3.998123569 | -0.835207338 | 0.001235594  | XXX | ND | c  |
| C    | 0.000        |              |              |     |    |    |
| C12  | -2.613496146 | -0.729486257 | 0.001104815  | XXX | ND | c  |
| C    | 0.000        |              |              |     |    |    |
| N13  | -2.033428188 | 0.479624886  | 0.000314857  | XXX | ND | n  |
| N    | 0.000        |              |              |     |    |    |
| C14  | -2.824539682 | 1.560476172  | -0.000294221 | XXX | ND | c  |
| C    | 0.000        |              |              |     |    |    |
| C15  | -4.204187029 | 1.418842014  | -0.000119019 | XXX | ND | c  |
| C    | 0.000        |              |              |     |    |    |
| PT16 | 0.000087193  | 0.568628550  | -0.000002150 | XXX | ND | pt |
| Pt   | 0.000        |              |              |     |    |    |
| N17  | 2.033592801  | 0.479374610  | -0.000319470 | XXX | ND | n  |
| N    | 0.000        |              |              |     |    |    |
| C18  | 2.613503151  | -0.729812469 | -0.000488313 | XXX | ND | c  |
| C    | 0.000        |              |              |     |    |    |
| C19  | 3.998116030  | -0.835718515 | -0.000683150 | XXX | ND | c  |
| C    | 0.000        |              |              |     |    |    |
| N20  | 4.797504069  | 0.227454099  | -0.000714519 | XXX | ND | n  |
| N    | 0.000        |              |              |     |    |    |
| C21  | 4.204476978  | 1.418303703  | -0.000555867 | XXX | ND | c  |
| C    | 0.000        |              |              |     |    |    |
| C22  | 2.824848122  | 1.560120262  | -0.000361542 | XXX | ND | c  |
| C    | 0.000        |              |              |     |    |    |
| N23  | 0.000357654  | 0.551355848  | 2.044159468  | XXX | ND | n  |
| N    | 0.000        |              |              |     |    |    |
| C24  | 0.000163410  | -0.570708383 | 2.829482068  | XXX | ND | c  |
| C    | 0.000        |              |              |     |    |    |
| C25  | 0.000372704  | -0.128565624 | 4.156276211  | XXX | ND | c  |
| C    | 0.000        |              |              |     |    |    |



Supplementary Material (ESI) for Dalton Transactions  
This journal is (c) The Royal Society of Chemistry 2007

|     |              |              |              |     |    |   |
|-----|--------------|--------------|--------------|-----|----|---|
| N26 | 0.000671548  | 1.246471775  | 4.206616202  | XXX | ND | n |
| N   | 0.000        |              |              |     |    |   |
| C27 | 0.000645566  | 1.592950619  | 2.935460573  | XXX | ND | c |
| C   | 0.000        |              |              |     |    |   |
| C28 | 0.000117235  | -1.121822447 | 5.150382725  | XXX | ND | c |
| C   | 0.000        |              |              |     |    |   |
| N29 | -0.000291871 | -2.408450335 | 4.778737645  | XXX | ND | n |
| N   | 0.000        |              |              |     |    |   |
| C30 | -0.000468872 | -2.695159960 | 3.468975511  | XXX | ND | c |
| C   | 0.000        |              |              |     |    |   |
| N31 | -0.000276870 | -1.857685230 | 2.438081107  | XXX | ND | n |
| N   | 0.000        |              |              |     |    |   |
| N32 | -0.000540485 | -0.821665910 | -6.469275049 | XXX | ND | n |
| N   | 0.000        |              |              |     |    |   |
| N33 | 0.000230520  | -0.821524906 | 6.469319118  | XXX | ND | n |
| N   | 0.000        |              |              |     |    |   |
| H34 | -0.000477282 | 0.136969466  | -6.766079364 | XXX | ND | h |
| H   | 0.000        |              |              |     |    |   |
| H35 | -0.000619985 | -1.566392692 | -7.142479894 | XXX | ND | h |
| H   | 0.000        |              |              |     |    |   |
| H36 | 0.000563474  | 0.137110371  | 6.766122503  | XXX | ND | h |
| H   | 0.000        |              |              |     |    |   |
| H37 | 0.000012176  | -1.566253564 | 7.142522604  | XXX | ND | h |
| H   | 0.000        |              |              |     |    |   |
| H38 | -0.000088184 | 2.619162667  | -2.597670267 | XXX | ND | h |
| H   | 0.000        |              |              |     |    |   |
| H39 | -0.000421554 | -3.753757167 | -3.226955399 | XXX | ND | h |
| H   | 0.000        |              |              |     |    |   |
| H40 | -4.464378193 | -1.813151807 | 0.001857018  | XXX | ND | h |
| H   | 0.000        |              |              |     |    |   |
| H41 | -1.960324430 | -1.590798173 | 0.001681575  | XXX | ND | h |
| H   | 0.000        |              |              |     |    |   |
| H42 | -2.345203145 | 2.528114653  | -0.000932145 | XXX | ND | h |
| H   | 0.000        |              |              |     |    |   |
| H43 | -4.840026937 | 2.296239017  | -0.000602374 | XXX | ND | h |
| H   | 0.000        |              |              |     |    |   |
| H44 | 1.960218174  | -1.591039143 | -0.000484647 | XXX | ND | h |
| H   | 0.000        |              |              |     |    |   |
| H45 | 4.464241433  | -1.813724820 | -0.000818616 | XXX | ND | h |
| H   | 0.000        |              |              |     |    |   |
| H46 | 4.840433454  | 2.295616273  | -0.000589426 | XXX | ND | h |
| H   | 0.000        |              |              |     |    |   |
| H47 | 2.345640343  | 2.527822530  | -0.000236594 | XXX | ND | h |
| H   | 0.000        |              |              |     |    |   |
| H48 | 0.000836006  | 2.619214078  | 2.597608666  | XXX | ND | h |
| H   | 0.000        |              |              |     |    |   |
| H49 | -0.000821481 | -3.753679621 | 3.227051543  | XXX | ND | h |
| H   | 0.000        |              |              |     |    |   |
| end |              |              |              |     |    |   |
| end |              |              |              |     |    |   |

Supplementary Material (ESI) for Dalton Transactions  
This journal is (c) The Royal Society of Chemistry 2007  
Atomic coordinates of **2**, *head-to-tail* conformer:

|      |              |              |              |     |    |    |
|------|--------------|--------------|--------------|-----|----|----|
| N1   | -0.104016320 | 3.742420061  | -2.018782687 | XXX | ND | n  |
| N    | 0.000        |              |              |     |    |    |
| C2   | -0.106242021 | 2.429688880  | -1.912023752 | XXX | ND | c  |
| C    | 0.000        |              |              |     |    |    |
| N3   | -0.030896000 | 1.946041641  | -0.629576729 | XXX | ND | n  |
| N    | 0.000        |              |              |     |    |    |
| C4   | 0.027407226  | 3.068195644  | 0.153645478  | XXX | ND | c  |
| C    | 0.000        |              |              |     |    |    |
| C5   | -0.019635199 | 4.164660714  | -0.712776505 | XXX | ND | c  |
| C    | 0.000        |              |              |     |    |    |
| C6   | 0.026523828  | 5.437817880  | -0.120577895 | XXX | ND | c  |
| C    | 0.000        |              |              |     |    |    |
| N7   | 0.111583801  | 5.528105617  | 1.214512292  | XXX | ND | n  |
| N    | 0.000        |              |              |     |    |    |
| C8   | 0.149366016  | 4.397543544  | 1.929904481  | XXX | ND | c  |
| C    | 0.000        |              |              |     |    |    |
| N9   | 0.113476621  | 3.140583197  | 1.495355546  | XXX | ND | n  |
| N    | 0.000        |              |              |     |    |    |
| N10  | -4.827914750 | -0.018647907 | 0.023078412  | XXX | ND | n  |
| N    | 0.000        |              |              |     |    |    |
| C11  | -4.127761754 | -0.918859989 | -0.662344167 | XXX | ND | c  |
| C    | 0.000        |              |              |     |    |    |
| C12  | -2.740084805 | -0.931916255 | -0.677249338 | XXX | ND | c  |
| C    | 0.000        |              |              |     |    |    |
| N13  | -2.051468856 | -0.008001430 | 0.010582524  | XXX | ND | n  |
| N    | 0.000        |              |              |     |    |    |
| C14  | -2.741094778 | 0.910663160  | 0.704278611  | XXX | ND | c  |
| C    | 0.000        |              |              |     |    |    |
| C15  | -4.128582459 | 0.887115006  | 0.702102592  | XXX | ND | c  |
| C    | 0.000        |              |              |     |    |    |
| PT16 | -0.016603048 | 0.000179292  | 0.001457610  | XXX | ND | pt |
| Pt   | 0.000        |              |              |     |    |    |
| N17  | 2.018076834  | 0.007236432  | -0.008903809 | XXX | ND | n  |
| N    | 0.000        |              |              |     |    |    |
| C18  | 2.704288381  | -0.886713561 | -0.737591607 | XXX | ND | c  |
| C    | 0.000        |              |              |     |    |    |
| C19  | 4.091888858  | -0.864474598 | -0.736495736 | XXX | ND | c  |
| C    | 0.000        |              |              |     |    |    |
| N20  | 4.793496528  | 0.013709466  | -0.024284225 | XXX | ND | n  |
| N    | 0.000        |              |              |     |    |    |
| C21  | 4.095617196  | 0.888418342  | 0.695707186  | XXX | ND | c  |
| C    | 0.000        |              |              |     |    |    |
| C22  | 2.707887925  | 0.904334620  | 0.712423314  | XXX | ND | c  |
| C    | 0.000        |              |              |     |    |    |
| N23  | -0.005466692 | -1.945701039 | 0.632349915  | XXX | ND | n  |
| N    | 0.000        |              |              |     |    |    |
| C24  | 0.024840233  | -3.066433025 | -0.154248100 | XXX | ND | c  |
| C    | 0.000        |              |              |     |    |    |
| C25  | 0.018232535  | -4.164358735 | 0.711509623  | XXX | ND | c  |
| C    | 0.000        |              |              |     |    |    |

Supplementary Material (ESI) for Dalton Transactions  
This journal is (c) The Royal Society of Chemistry 2007

|     |              |              |              |     |    |   |
|-----|--------------|--------------|--------------|-----|----|---|
| N26 | -0.014404946 | -3.744288384 | 2.020513034  | XXX | ND | n |
| N   | 0.000        |              |              |     |    |   |
| C27 | -0.026936469 | -2.431398996 | 1.916030626  | XXX | ND | c |
| C   | 0.000        |              |              |     |    |   |
| C28 | 0.045233331  | -5.436332568 | 0.115612528  | XXX | ND | c |
| C   | 0.000        |              |              |     |    |   |
| N29 | 0.074872564  | -5.523986160 | -1.222082663 | XXX | ND | n |
| N   | 0.000        |              |              |     |    |   |
| C30 | 0.078286925  | -4.392112197 | -1.936448349 | XXX | ND | c |
| C   | 0.000        |              |              |     |    |   |
| N31 | 0.055150237  | -3.136009629 | -1.498505541 | XXX | ND | n |
| N   | 0.000        |              |              |     |    |   |
| N32 | -0.011404600 | 6.574317010  | -0.850721554 | XXX | ND | n |
| N   | 0.000        |              |              |     |    |   |
| N33 | 0.042302747  | -6.574192016 | 0.844594332  | XXX | ND | n |
| N   | 0.000        |              |              |     |    |   |
| H34 | -0.074918811 | 6.526490246  | -1.851332413 | XXX | ND | h |
| H   | 0.000        |              |              |     |    |   |
| H35 | 0.024738906  | 7.461515550  | -0.381942549 | XXX | ND | h |
| H   | 0.000        |              |              |     |    |   |
| H36 | 0.020818569  | -6.528312188 | 1.847086620  | XXX | ND | h |
| H   | 0.000        |              |              |     |    |   |
| H37 | 0.062292471  | -7.460472401 | 0.373114331  | XXX | ND | h |
| H   | 0.000        |              |              |     |    |   |
| H38 | -0.163145187 | 1.760219404  | -2.757604433 | XXX | ND | h |
| H   | 0.000        |              |              |     |    |   |
| H39 | 0.219090685  | 4.530347730  | 3.005271449  | XXX | ND | h |
| H   | 0.000        |              |              |     |    |   |
| H40 | -4.680746071 | -1.662802751 | -1.223373854 | XXX | ND | h |
| H   | 0.000        |              |              |     |    |   |
| H41 | -2.170071998 | -1.665825568 | -1.230419259 | XXX | ND | h |
| H   | 0.000        |              |              |     |    |   |
| H42 | -2.172157095 | 1.649596455  | 1.251403966  | XXX | ND | h |
| H   | 0.000        |              |              |     |    |   |
| H43 | -4.682215104 | 1.626920100  | 1.267943971  | XXX | ND | h |
| H   | 0.000        |              |              |     |    |   |
| H44 | 2.131954486  | -1.605131703 | -1.309397649 | XXX | ND | h |
| H   | 0.000        |              |              |     |    |   |
| H45 | 4.643772262  | -1.583138285 | -1.330576030 | XXX | ND | h |
| H   | 0.000        |              |              |     |    |   |
| H46 | 4.650640179  | 1.609728184  | 1.283624392  | XXX | ND | h |
| H   | 0.000        |              |              |     |    |   |
| H47 | 2.137988629  | 1.619958334  | 1.290610388  | XXX | ND | h |
| H   | 0.000        |              |              |     |    |   |
| H48 | -0.052807777 | -1.763399357 | 2.764271194  | XXX | ND | h |
| H   | 0.000        |              |              |     |    |   |
| H49 | 0.103480670  | -4.522847672 | -3.014045246 | XXX | ND | h |
| H   | 0.000        |              |              |     |    |   |
| end |              |              |              |     |    |   |
| end |              |              |              |     |    |   |

**References**

- 1 See for example: R. Laatikainen, M. Niemitz, U. Weber, J. Sundelin, T. Hassinen and J. Vepsäläinen, *J. Magn. Reson. Ser. A*, 1996, **120**, 1. See also: *Peak Research NMR Software*, Perch Solutions Ltd., Kuopio, Finland, 2003 (<http://www.perchsolutions.com>).
- 2 J. Pihlasalo, K. D. Klika, D. Yu. Murzin and V. Nieminen, *Theochem-J. Mol. Struct.*, 2007, in press.
